# Supplementary material
Source: PubMed Central journal article supplement (PMC8792925)
Supplement: ao1c05998_si_001.pdf [file ao1c05998_si_001.pdf]

## **Supporting Information**

# **Potent Inhibitory Activities of the Adenosine Analogue Cordycepin on SARS-CoV-2 Replication**

**Amgad M. Rabie<sup>a,b,\*</sup>**

**<sup>a</sup> Dr. Amgad Rabie's Research Lab. for Drug Discovery (DARLD), Mansoura 35511,  
Egypt**

**<sup>b</sup> Pharmaceutical Organic Chemistry Department, Faculty of Pharmacy, Mansoura  
University, Mansoura 35516, Egypt**

**\* E-mails: [amgadpharmacist1@yahoo.com](mailto:amgadpharmacist1@yahoo.com), [dr.amgadrabie@gmail.com](mailto:dr.amgadrabie@gmail.com)**

**ORCID iD: 0000-0003-3681-114X**

## Comparison of input compound with dataset compounds

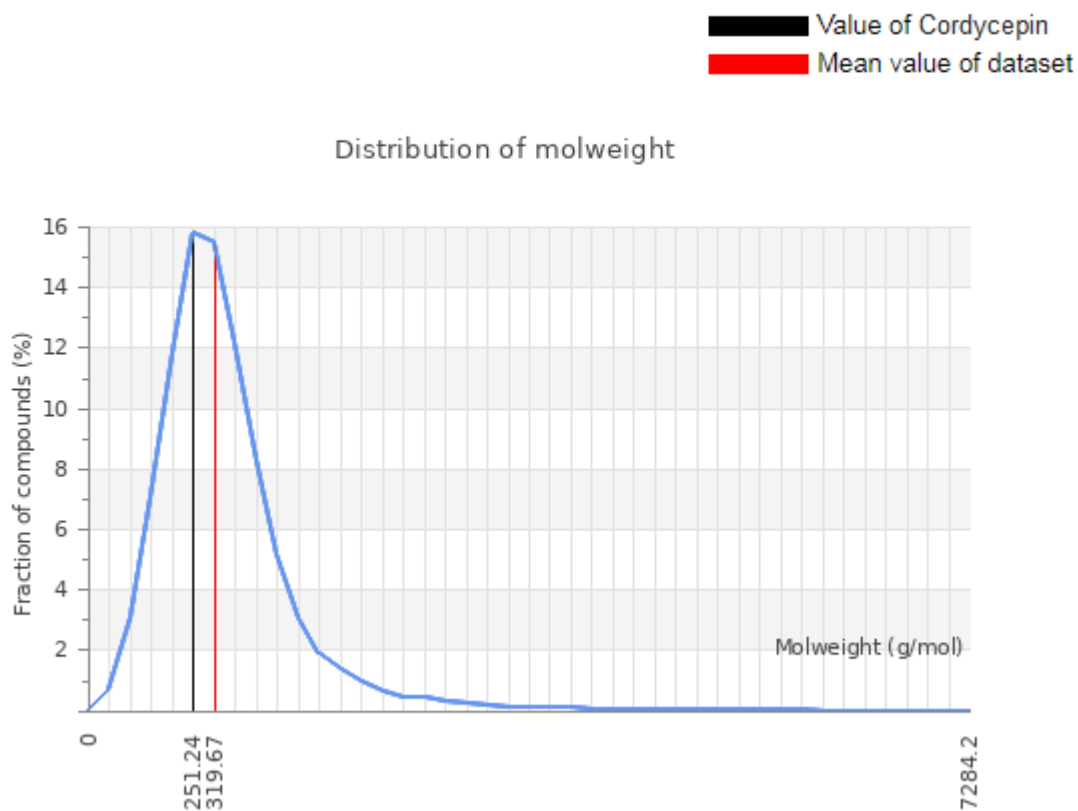

**Figure S1.** Graphic comparison of the molecular weight (molweight) of cordycepin with the mean value of molecular weights of all the dataset compounds (using ProTox-II Virtual Laboratory methodology).

| Toxicity Model Report                      |                                                                                       |               |            |             |
|--------------------------------------------|---------------------------------------------------------------------------------------|---------------|------------|-------------|
| Classification                             | Target                                                                                | Shorthand     | Prediction | Probability |
| Organ toxicity                             | Hepatotoxicity                                                                        | dili          | Inactive   | 0.63        |
| Toxicity end points                        | Carcinogenicity                                                                       | carcino       | Inactive   | 0.68        |
| Toxicity end points                        | Immunotoxicity                                                                        | immuno        | Inactive   | 0.99        |
| Toxicity end points                        | Mutagenicity                                                                          | mutagen       | Active     | 0.69        |
| Toxicity end points                        | Cytotoxicity                                                                          | cyto          | Inactive   | 0.58        |
| Tox21-Nuclear receptor signalling pathways | Aryl hydrocarbon Receptor (AhR)                                                       | nr_ahr        | Inactive   | 0.89        |
| Tox21-Nuclear receptor signalling pathways | Androgen Receptor (AR)                                                                | nr_ar         | Inactive   | 0.99        |
| Tox21-Nuclear receptor signalling pathways | Androgen Receptor Ligand Binding Domain (AR-LBD)                                      | nr_ar_lbd     | Inactive   | 1.0         |
| Tox21-Nuclear receptor signalling pathways | Aromatase                                                                             | nr_aromatase  | Inactive   | 0.91        |
| Tox21-Nuclear receptor signalling pathways | Estrogen Receptor Alpha (ER)                                                          | nr_er         | Inactive   | 0.98        |
| Tox21-Nuclear receptor signalling pathways | Estrogen Receptor Ligand Binding Domain (ER-LBD)                                      | nr_er_lbd     | Inactive   | 1.0         |
| Tox21-Nuclear receptor signalling pathways | Peroxisome Proliferator Activated Receptor Gamma (PPAR-Gamma)                         | nr_ppar_gamma | Inactive   | 0.80        |
| Tox21-Stress response pathways             | Nuclear factor (erythroid-derived 2)-like 2/antioxidant responsive element (nrf2/ARE) | sr_are        | Inactive   | 0.99        |
| Tox21-Stress response pathways             | Heat shock factor response element (HSE)                                              | sr_hse        | Inactive   | 0.99        |
| Tox21-Stress response pathways             | Mitochondrial Membrane Potential (MMP)                                                | sr_mmp        | Inactive   | 0.97        |
| Tox21-Stress response pathways             | Phosphoprotein (Tumor Suppressor) p53                                                 | sr_p53        | Inactive   | 0.81        |
| Tox21-Stress response pathways             | ATPase family AAA domain-containing protein 5 (ATAD5)                                 | sr_atad5      | Inactive   | 0.71        |

**Figure S2.** A screenshot of the output table for the ProTox-II Toxicity Model Report which demonstrates the expected probabilities of the main toxicities computationally analyzed for cordycepin molecule inside the human body (using ProTox-II Virtual Laboratory methodology).
